# Supplementary material
Source: publisher figshare collection journal article supplement (https://tandf.figshare.com/articles/dataset/_/19102319)
Supplement: Supplementary file 1 [file 2]

**Supplementary Table 3: Combination Index Values for all Combination Treatments**

| Treatment                    | ACI-98          | MSU-39        | MSU-64 | MSU-69        | MECPK-GFP     |
|------------------------------|-----------------|---------------|--------|---------------|---------------|
| 0.2 mM DFMO/4 $\mu$ M GC7    | 11865 +/- 20495 | 0.42 +/- 0.28 | N/C    | 0.20 +/- 0.01 | 0.13 +/- 0.02 |
| 0.2 mM DFMO/12.5 $\mu$ M GC7 | 13.2 +/- 21.14  | 0.17 +/- 0.02 | N/C    | 0.38 +/- 0.02 | 0.36 +/- 0.03 |
| 0.2 mM DFMO/50 $\mu$ M GC7   | 0.23 +/- 0.20   | 0.35 +/- 0.10 | N/C    | 0.91 +/- 0.05 | 1.33 +/- 0.12 |
| 1 mM DFMO/4 $\mu$ M GC7      | 2639 +/- 4552   | 0.35 +/- 0.08 | N/C    | 0.25 +/- 0.02 | 0.20 +/- 0.06 |
| 1 mM DFMO/12.5 $\mu$ M GC7   | 0.93 +/- 0.37   | 0.20 +/- 0.01 | N/C    | 0.38 +/- 0.03 | 0.43 +/- 0.07 |
| 1 mM DFMO/50 $\mu$ M GC7     | 0.20 +/- 0.19   | 0.35 +/- 0.09 | N/C    | 0.88 +/- 0.04 | 1.35 +/- 0.17 |
| 5 mM DFMO/4 $\mu$ M GC7      | 1936 +/- 3341   | 0.95 +/- 0.35 | N/C    | 0.27 +/- 0.10 | 0.44 +/- 0.32 |
| 5 mM DFMO/12.5 $\mu$ M GC7   | 0.32 +/- 0.07   | 0.44 +/- 0.12 | N/C    | 0.34 +/- 0.01 | 0.65 +/- 0.33 |
| 5 mM DFMO/50 $\mu$ M GC7     | 0.17 +/- 0.16   | 0.40 +/- 0.10 | N/C    | 0.80 +/- 0.06 | 1.40 +/- 0.43 |

<1 Synergistic, 0 Additive, >1 Antagonistic; N/C; not scored – software was unable to determine a value.
