# Supplementary material
Source: publisher figshare collection journal article supplement (https://tandf.figshare.com/articles/dataset/_/19102319)
Supplement: Supplementary file 4 [file 2]

**Supplementary Table 1.** Endometrial Cancer and Normal epithelial tissue expression data.

Affymetrix GeneChip™ Human Genome U133 Plus 2.0 Array signals were normalized to target value of 500 using MAS 5.0 algorithm.

The transcripts 201122\_x\_at and 220198\_s\_at were found to target longest part of the genes eIF5A1 and eIF5A2 respectively.

| Sample | Histology    | FIGO<br>Stage: I,<br>II, III, IV | Stage | Grade | eIF5A1:<br>201122_x_at | eIF5A1:<br>201123_s_at | eIF5A1-<br>5'end:<br>213753_x_at | eIF5A2:<br>220198_s_at | eIF5A2-<br>5'end:<br>235289_at | eIF5A2-<br>5'end:<br>235296_at |
|--------|--------------|----------------------------------|-------|-------|------------------------|------------------------|----------------------------------|------------------------|--------------------------------|--------------------------------|
| E1     | Endometrioid | IA                               | Early | G1    | 1550                   | 661                    | 1109                             | 251                    | 406                            | 705                            |
| E2     | Endometrioid | IA                               | Early | G1    | 1435                   | 429                    | 1086                             | 108                    | 56                             | 199                            |
| E3     | Endometrioid | IA                               | Early | G3    | 1568                   | 834                    | 1260                             | 110                    | 107                            | 89                             |
| E4     | Endometrioid | IA                               | Early | G3    | 2163                   | 1456                   | 1360                             | 64                     | 4                              | 2                              |
| E5     | Endometrioid | IA                               | Early | G3    | 962                    | 336                    | 1013                             | 53                     | 75                             | 134                            |
| E6     | Endometrioid | IA                               | Early | G2    | 1334                   | 265                    | 1310                             | 31                     | 65                             | 4                              |
| E7     | Endometrioid | IA                               | Early | G2    | 1077                   | 190                    | 670                              | 44                     | 79                             | 100                            |
| E8     | Endometrioid | IA                               | Early | G2    | 595                    | 334                    | 541                              | 175                    | 250                            | 570                            |
| E9     | Endometrioid | IA                               | Early | G2    | 1155                   | 757                    | 744                              | 8                      | 7                              | 32                             |
| E10    | Endometrioid | IA                               | Early | G1    | 654                    | 134                    | 508                              | 151                    | 285                            | 427                            |
| E11    | Endometrioid | IA                               | Early | G2    | 700                    | 740                    | 442                              | 14                     | 56                             | 35                             |
| E12    | Endometrioid | IA                               | Early | G1    | 990                    | 171                    | 1010                             | 14                     | 134                            | 181                            |
| E13    | Endometrioid | IA                               | Early | G2    | 1444                   | 826                    | 992                              | 17                     | 18                             | 16                             |
| E14    | Endometrioid | IA                               | Early | G2    | 1186                   | 687                    | 714                              | 75                     | 42                             | 161                            |
| E15    | Endometrioid | IA                               | Early | G1    | 1626                   | 1270                   | 811                              | 13                     | 8                              | 40                             |
| E16    | Endometrioid | IA                               | Early | G1    | 647                    | 156                    | 558                              | 14                     | 102                            | 190                            |
| E17    | Endometrioid | IA                               | Early | G2    | 1482                   | 1076                   | 926                              | 143                    | 90                             | 346                            |
| E18    | Endometrioid | IA                               | Early | G2    | 2127                   | 552                    | 1317                             | 60                     | 25                             | 115                            |
| E19    | Endometrioid | IA                               | Early | G1    | 2160                   | 839                    | 1345                             | 22                     | 4                              | 11                             |
| E20    | Endometrioid | IA                               | Early | G1    | 1066                   | 255                    | 633                              | 13                     | 53                             | 106                            |
| E21    | Endometrioid | IA                               | Early | G1    | 1071                   | 382                    | 989                              | 48                     | 10                             | 45                             |
| E22    | Endometrioid | IA                               | Early | G3    | 959                    | 616                    | 582                              | 8                      | 13                             | 27                             |
| E23    | Endometrioid | IA                               | Early | G1    | 1071                   | 353                    | 523                              | 330                    | 678                            | 949                            |
| E24    | Endometrioid | IA                               | Early | G2    | 1533                   | 183                    | 1218                             | 90                     | 59                             | 205                            |
| E25    | Endometrioid | IB                               | Early | G3    | 925                    | 189                    | 459                              | 148                    | 389                            | 1083                           |
| E26    | Endometrioid | IB                               | Early | G1    | 733                    | 59                     | 848                              | 11                     | 113                            | 93                             |
| E27    | Endometrioid | IB                               | Early | G2    | 1286                   | 286                    | 1275                             | 57                     | 43                             | 52                             |
| E28    | Endometrioid | IB                               | Early | G1    | 830                    | 44                     | 1051                             | 65                     | 5                              | 35                             |
| E29    | Endometrioid | IB                               | Early | G2    | 522                    | 172                    | 546                              | 6                      | 1                              | 37                             |
| E30    | Endometrioid | IB                               | Early | G2    | 1798                   | 520                    | 1457                             | 48                     | 16                             | 54                             |
| E31    | Endometrioid | IB                               | Early | G1    | 2063                   | 220                    | 1904                             | 75                     | 58                             | 46                             |
| E32    | Endometrioid | IB                               | Early | G1    | 772                    | 202                    | 424                              | 47                     | 28                             | 79                             |
| E33    | Endometrioid | IB                               | Early | G3    | 1678                   | 291                    | 1613                             | 9                      | 32                             | 55                             |
| E34    | Endometrioid | IB                               | Early | G2    | 900                    | 169                    | 1068                             | 22                     | 10                             | 41                             |
| E35    | Endometrioid | IB                               | Early | G2    | 765                    | 253                    | 420                              | 41                     | 48                             | 53                             |
| E36    | Endometrioid | IB                               | Early | G1    | 1193                   | 445                    | 942                              | 65                     | 5                              | 49                             |
| E37    | Endometrioid | IB                               | Early | G2    | 708                    | 309                    | 676                              | 133                    | 313                            | 681                            |
| E38    | Endometrioid | IB                               | Early | G2    | 1886                   | 921                    | 1052                             | 9                      | 4                              | 96                             |
| E39    | Endometrioid | IB                               | Early | G2    | 720                    | 127                    | 646                              | 43                     | 32                             | 95                             |
| E40    | Endometrioid | IB                               | Early | G1    | 651                    | 300                    | 646                              | 55                     | 8                              | 63                             |
| E41    | Endometrioid | IB                               | Early | G1    | 1174                   | 171                    | 573                              | 13                     | 50                             | 86                             |
| E42    | Endometrioid | IB                               | Early | G2    | 830                    | 137                    | 530                              | 55                     | 95                             | 47                             |
| E43    | Endometrioid | IB                               | Early | G2    | 419                    | 143                    | 987                              | 8                      | 65                             | 161                            |
| E44    | Endometrioid | IB                               | Early | G1    | 903                    | 415                    | 503                              | 273                    | 428                            | 702                            |
| E45    | Endometrioid | IB                               | Early | G1    | 924                    | 812                    | 802                              | 284                    | 443                            | 923                            |
| E46    | Endometrioid | IB                               | Early | G2    | 481                    | 430                    | 296                              | 232                    | 512                            | 1160                           |
| E47    | Endometrioid | IB                               | Early | G3    | 881                    | 374                    | 488                              | 65                     | 23                             | 96                             |
| E48    | Endometrioid | IB                               | Early | G2    | 1950                   | 727                    | 1043                             | 69                     | 6                              | 191                            |
| E49    | Endometrioid | IB                               | Early | G3    | 2149                   | 1918                   | 658                              | 5                      | 11                             | 44                             |
| E50    | Endometrioid | IB                               | Early | G1    | 1077                   | 324                    | 393                              | 94                     | 44                             | 50                             |
| E51    | Endometrioid | IB                               | Early | G2    | 985                    | 207                    | 694                              | 84                     | 123                            | 193                            |
| E52    | Endometrioid | IB                               | Early | G2    | 2034                   | 383                    | 1493                             | 10                     | 7                              | 15                             |
| E53    | Endometrioid | IB                               | Early | G2    | 1597                   | 364                    | 1048                             | 10                     | 62                             | 117                            |
| E54    | Endometrioid | IB                               | Early | G3    | 954                    | 50                     | 732                              | 98                     | 160                            | 255                            |
| E55    | Endometrioid | IB                               | Early | G3    | 1112                   | 732                    | 826                              | 91                     | 79                             | 155                            |
| E56    | Endometrioid | IB                               | Early | G2    | 979                    | 429                    | 651                              | 132                    | 356                            | 473                            |
| E57    | Endometrioid | IB                               | Early | G1    | 587                    | 364                    | 577                              | 90                     | 27                             | 116                            |
| E58    | Endometrioid | IB                               | Early | G1    | 1550                   | 125                    | 2080                             | 116                    | 29                             | 174                            |
| E59    | Endometrioid | IB                               | Early | G1    | 1472                   | 349                    | 706                              | 28                     | 73                             | 60                             |
| E60    | Endometrioid | IB                               | Early | G1    | 945                    | 182                    | 457                              | 50                     | 358                            | 254                            |

|      |              |      |       |    |      |      |      |     |     |      |
|------|--------------|------|-------|----|------|------|------|-----|-----|------|
| E61  | Endometrioid | IB   | Early | G2 | 1093 | 534  | 526  | 217 | 262 | 449  |
| E62  | Endometrioid | IB   | Early | G2 | 1187 | 146  | 515  | 26  | 54  | 92   |
| E63  | Endometrioid | IB   | Early | G1 | 958  | 306  | 703  | 30  | 46  | 81   |
| E64  | Endometrioid | IB   | Early | G2 | 1476 | 739  | 725  | 58  | 25  | 55   |
| E65  | Endometrioid | IB   | Early | G1 | 1346 | 276  | 1090 | 44  | 3   | 52   |
| E66  | Endometrioid | IB   | Early | G1 | 471  | 93   | 609  | 168 | 696 | 778  |
| E67  | Endometrioid | IB   | Early | G1 | 1401 | 569  | 825  | 102 | 77  | 39   |
| E68  | Endometrioid | IB   | Early | G2 | 682  | 113  | 725  | 42  | 79  | 171  |
| E69  | Endometrioid | IB   | Early | G1 | 1511 | 394  | 894  | 97  | 65  | 87   |
| E70  | Endometrioid | IB   | Early | G1 | 816  | 279  | 395  | 26  | 131 | 198  |
| E71  | Endometrioid | IB   | Early | G3 | 1631 | 821  | 1062 | 41  | 45  | 48   |
| E72  | Endometrioid | IB   | Early | G2 | 2239 | 354  | 2053 | 60  | 44  | 66   |
| E73  | Endometrioid | IB   | Early | G2 | 1577 | 208  | 752  | 304 | 403 | 1009 |
| E74  | Endometrioid | IB   | Early | G3 | 947  | 606  | 629  | 122 | 83  | 195  |
| E75  | Endometrioid | IB   | Early | G1 | 1779 | 217  | 972  | 44  | 9   | 76   |
| E76  | Endometrioid | IB   | Early | G2 | 1330 | 715  | 546  | 50  | 7   | 57   |
| E77  | Endometrioid | IB   | Early | G2 | 714  | 282  | 542  | 10  | 35  | 46   |
| E78  | Endometrioid | IB   | Early | G1 | 1971 | 778  | 791  | 35  | 5   | 40   |
| E79  | Endometrioid | IB   | Early | G3 | 903  | 334  | 548  | 50  | 41  | 76   |
| E80  | Endometrioid | IB   | Early | G2 | 1084 | 185  | 609  | 71  | 2   | 7    |
| E81  | Endometrioid | IB   | Early | G1 | 1803 | 786  | 1451 | 62  | 146 | 249  |
| E82  | Endometrioid | IB   | Early | G1 | 1446 | 374  | 737  | 116 | 72  | 154  |
| E83  | Endometrioid | IB   | Early | G1 | 813  | 353  | 364  | 198 | 471 | 861  |
| E84  | Endometrioid | IB   | Early | G1 | 794  | 346  | 578  | 108 | 112 | 310  |
| E85  | Endometrioid | IB   | Early | G3 | 1254 | 579  | 806  | 44  | 29  | 70   |
| E86  | Endometrioid | IB   | Early | G1 | 2300 | 648  | 1036 | 85  | 70  | 124  |
| E87  | Endometrioid | IC   | Early | G3 | 1325 | 53   | 1346 | 77  | 62  | 59   |
| E88  | Endometrioid | IC   | Early | G2 | 994  | 367  | 498  | 61  | 45  | 102  |
| E89  | Endometrioid | IC   | Early | G3 | 1493 | 484  | 753  | 96  | 44  | 73   |
| E90  | Endometrioid | IC   | Early | G3 | 871  | 390  | 326  | 75  | 108 | 148  |
| E91  | Endometrioid | IC   | Early | G2 | 1619 | 392  | 1052 | 62  | 29  | 105  |
| E92  | Endometrioid | IC   | Early | G2 | 977  | 296  | 993  | 58  | 53  | 69   |
| E93  | Endometrioid | IC   | Early | G2 | 1264 | 348  | 993  | 42  | 3   | 23   |
| E94  | Endometrioid | IC   | Early | G2 | 1875 | 777  | 1082 | 12  | 6   | 54   |
| E95  | Endometrioid | IC   | Early | G2 | 1726 | 676  | 1212 | 33  | 29  | 45   |
| E96  | Endometrioid | IC   | Early | G1 | 2876 | 525  | 3244 | 8   | 36  | 110  |
| E97  | Endometrioid | IC   | Early | G1 | 1182 | 203  | 688  | 213 | 324 | 675  |
| E98  | Endometrioid | IC   | Early | G2 | 984  | 270  | 448  | 119 | 169 | 305  |
| E99  | Endometrioid | IC   | Early | G2 | 998  | 83   | 1572 | 28  | 387 | 117  |
| E100 | Endometrioid | IC   | Early | G3 | 1242 | 972  | 837  | 30  | 35  | 60   |
| E101 | Endometrioid | IC   | Early | G2 | 913  | 691  | 507  | 40  | 62  | 144  |
| E102 | Endometrioid | IC   | Early | G2 | 1589 | 451  | 755  | 77  | 10  | 40   |
| E103 | Endometrioid | IC   | Early | G2 | 921  | 240  | 492  | 28  | 54  | 106  |
| E104 | Endometrioid | IC   | Early | G3 | 1114 | 59   | 861  | 67  | 5   | 75   |
| E105 | Endometrioid | IC   | Early | G3 | 1924 | 1416 | 805  | 124 | 87  | 267  |
| E106 | Endometrioid | IC   | Early | G3 | 1116 | 645  | 677  | 19  | 80  | 130  |
| E107 | Endometrioid | IC   | Early | G3 | 658  | 254  | 474  | 12  | 22  | 180  |
| E108 | Endometrioid | IC   | Early | G2 | 1189 | 206  | 939  | 6   | 14  | 64   |
| E109 | Endometrioid | IC   | Early | G1 | 1672 | 739  | 896  | 22  | 7   | 64   |
| E110 | Endometrioid | IC   | Early | G1 | 1365 | 387  | 1108 | 130 | 616 | 518  |
| E111 | Endometrioid | IC   | Early | G2 | 624  | 314  | 405  | 3   | 4   | 56   |
| E112 | Endometrioid | IC   | Early | G2 | 1076 | 118  | 1034 | 117 | 43  | 14   |
| E113 | Endometrioid | IC   | Early | G1 | 1640 | 661  | 1061 | 10  | 45  | 94   |
| E114 | Endometrioid | IC   | Early | G3 | 1347 | 892  | 1216 | 167 | 191 | 649  |
| E115 | Endometrioid | IC   | Early | G3 | 1734 | 857  | 926  | 56  | 40  | 101  |
| E116 | Endometrioid | IC   | Early | G2 | 445  | 391  | 462  | 372 | 124 | 593  |
| E117 | Endometrioid | IC   | Early | G2 | 1348 | 389  | 763  | 6   | 24  | 35   |
| E118 | Endometrioid | IC   | Early | G2 | 2607 | 946  | 762  | 23  | 11  | 61   |
| E119 | Endometrioid | IC   | Early | G2 | 2869 | 304  | 1916 | 14  | 30  | 83   |
| E120 | Endometrioid | IC   | Early | G2 | 2556 | 742  | 977  | 53  | 5   | 37   |
| E121 | Endometrioid | IC   | Early | G2 | 1091 | 655  | 697  | 30  | 48  | 48   |
| E122 | Endometrioid | IC   | Early | G2 | 1236 | 378  | 1110 | 53  | 61  | 89   |
| E123 | Endometrioid | IIIC | Adv   | G3 | 842  | 67   | 992  | 16  | 75  | 78   |
| E124 | Endometrioid | IIIC | Adv   | G3 | 1747 | 1349 | 959  | 70  | 8   | 80   |
| E125 | Endometrioid | IVB  | Adv   | G2 | 334  | 187  | 127  | 43  | 69  | 52   |
| E126 | Endometrioid | IIIC | Adv   | G3 | 1880 | 374  | 1173 | 73  | 49  | 70   |

|      |              |      |       |    |      |      |      |     |     |      |
|------|--------------|------|-------|----|------|------|------|-----|-----|------|
| E127 | Endometrioid | IIB  | Early | G3 | 2236 | 1449 | 620  | 59  | 38  | 261  |
| E128 | Endometrioid | IIB  | Early | G3 | 604  | 122  | 633  | 88  | 103 | 132  |
| E129 | Endometrioid | IIIC | Adv   | G3 | 1414 | 426  | 532  | 384 | 364 | 1369 |
| E130 | Endometrioid | IIIC | Adv   | G2 | 2356 | 1723 | 1323 | 7   | 16  | 56   |
| E131 | Endometrioid | IIIC | Adv   | G2 | 1080 | 145  | 749  | 95  | 124 | 271  |
| E132 | Endometrioid | IIIC | Adv   | G2 | 2179 | 847  | 1495 | 25  | 51  | 67   |
| E133 | Endometrioid | IIIC | Adv   | G2 | 1580 | 137  | 874  | 32  | 5   | 48   |
| E134 | Endometrioid | IVB  | Adv   | G2 | 592  | 196  | 293  | 43  | 73  | 104  |
| E135 | Endometrioid | IVB  | Adv   | G3 | 1582 | 602  | 785  | 147 | 32  | 91   |
| E136 | Endometrioid | IIIA | Early | G2 | 1124 | 62   | 887  | 98  | 61  | 137  |
| E137 | Endometrioid | IVB  | Adv   | G3 | 1553 | 168  | 1133 | 38  | 98  | 163  |
| E138 | Endometrioid | IIIC | Adv   | G3 | 1401 | 606  | 663  | 46  | 40  | 162  |
| E139 | Endometrioid | IIIC | Adv   | G3 | 1281 | 190  | 902  | 9   | 8   | 42   |
| E140 | Endometrioid | IVB  | Adv   | G3 | 1997 | 798  | 935  | 16  | 54  | 207  |
| S1   | Serous       | IIIC | Adv   | G3 | 1574 | 107  | 692  | 140 | 114 | 155  |
| S2   | Serous       | IIIC | Adv   | G3 | 649  | 214  | 499  | 7   | 28  | 68   |
| S3   | Serous       | IVB  | Adv   | G3 | 539  | 168  | 512  | 101 | 316 | 369  |
| S4   | Serous       | IVB  | Adv   | G3 | 1068 | 505  | 564  | 94  | 118 | 210  |
| S5   | Serous       | IVB  | Adv   | G3 | 2106 | 1264 | 529  | 68  | 29  | 134  |
| S6   | Serous       | IIIC | Adv   | G3 | 594  | 516  | 388  | 33  | 82  | 166  |
| S7   | Serous       | IIIC | Adv   | G3 | 1705 | 650  | 957  | 50  | 34  | 75   |
| S8   | Serous       | IB   | Early | G3 | 812  | 133  | 721  | 43  | 42  | 124  |
| S9   | Serous       | IB   | Early | G3 | 2359 | 560  | 1937 | 54  | 6   | 52   |
| S10  | Serous       | IVB  | Adv   | G3 | 773  | 182  | 639  | 54  | 80  | 104  |
| S11  | Serous       | IVB  | Adv   | G3 | 884  | 597  | 546  | 38  | 40  | 99   |
| S12  | Serous       | IVB  | Adv   | G3 | 653  | 334  | 487  | 87  | 120 | 257  |
| S13  | Serous       | IIIC | Adv   | G3 | 432  | 105  | 612  | 167 | 204 | 346  |
| S14  | Serous       | IB   | Early | G3 | 490  | 65   | 333  | 266 | 481 | 1157 |
| S15  | Serous       | IA   | Early | G2 | 1121 | 112  | 1537 | 108 | 99  | 147  |
| S16  | Serous       | IB   | Early | G3 | 711  | 5    | 769  | 46  | 22  | 31   |
| S17  | Serous       | IA   | Early | G3 | 755  | 393  | 476  | 66  | 56  | 86   |
| S18  | Serous       | IA   | Early | G3 | 969  | 220  | 627  | 50  | 62  | 133  |
| S19  | Serous       | IB   | Early | G3 | 1544 | 14   | 1225 | 36  | 11  | 165  |
| S20  | Serous       | IA   | Early | G2 | 992  | 76   | 618  | 23  | 17  | 111  |
| S21  | Serous       | IB   | Early | G2 | 790  | 73   | 492  | 55  | 2   | 7    |
| S22  | Serous       | I    | Early | G3 | 762  | 34   | 448  | 13  | 109 | 108  |
| S23  | Serous       | IIIC | Adv   | G3 | 807  | 640  | 335  | 82  | 46  | 130  |
| S24  | Serous       | IVB  | Adv   | G3 | 1264 | 440  | 899  | 102 | 8   | 96   |
| S25  | Serous       | IVB  | Adv   | G3 | 580  | 171  | 420  | 36  | 17  | 55   |
| S26  | Serous       | IVB  | Adv   | G3 | 728  | 390  | 753  | 10  | 45  | 141  |
| S27  | Serous       | IIIC | Adv   | G3 | 754  | 345  | 692  | 138 | 92  | 436  |
| S28  | Serous       | IIIA | Early | G3 | 2075 | 507  | 969  | 71  | 27  | 91   |
| S29  | Serous       | IVB  | Adv   | G3 | 612  | 258  | 485  | 111 | 110 | 174  |
| S30  | Serous       | IIIC | Adv   | G3 | 590  | 229  | 397  | 111 | 76  | 71   |
| S31  | Serous       | IIIA | Early | G3 | 1324 | 427  | 1212 | 67  | 47  | 123  |
| S32  | Serous       | IIIC | Adv   | G3 | 782  | 236  | 489  | 9   | 100 | 164  |
| S33  | Serous       | IVB  | Adv   | G3 | 457  | 226  | 320  | 284 | 78  | 271  |
| S34  | Serous       | IVB  | Adv   | G3 | 1096 | 258  | 680  | 47  | 220 | 319  |
| S35  | Serous       | IVB  | Adv   | G3 | 932  | 289  | 439  | 53  | 121 | 238  |
| S36  | Serous       | IIIC | Adv   | G3 | 1311 | 772  | 756  | 38  | 52  | 66   |
| S37  | Serous       | IIIA | Early | G3 | 2060 | 1692 | 867  | 45  | 68  | 74   |
| N1   | Normal       |      |       |    | 541  | 11   | 618  | 11  | 128 | 319  |
| N2   | Normal       |      |       |    | 896  | 120  | 552  | 23  | 151 | 158  |
| N3   | Normal       |      |       |    | 860  | 275  | 602  | 24  | 94  | 144  |
| N4   | Normal       |      |       |    | 402  | 108  | 231  | 36  | 158 | 231  |
| N5   | Normal       |      |       |    | 701  | 67   | 520  | 13  | 195 | 205  |
| N6   | Normal       |      |       |    | 532  | 61   | 339  | 11  | 142 | 137  |
| N7   | Normal       |      |       |    | 812  | 166  | 470  | 63  | 85  | 54   |
| N8   | Normal       |      |       |    | 535  | 117  | 697  | 96  | 10  | 137  |
| N9   | Normal       |      |       |    | 524  | 83   | 597  | 11  | 218 | 102  |
| N10  | Normal       |      |       |    | 533  | 100  | 346  | 34  | 115 | 122  |
| N11  | Normal       |      |       |    | 1099 | 198  | 888  | 15  | 144 | 178  |
| N12  | Normal       |      |       |    | 666  | 264  | 376  | 53  | 134 | 148  |

Probe Set ID  
Representative Public ID

201122\_x\_at 201123\_s\_at 213753\_x\_at 220198\_s\_at 235289\_at 235296\_at  
BC000751 NM\_001970 BF541557 NM\_020390 AV747725 BG500474

|                      |                                             |                 |                 |                                              |                 |                 |
|----------------------|---------------------------------------------|-----------------|-----------------|----------------------------------------------|-----------------|-----------------|
| UniGene ID           | Hs.534314                                   | Hs.534314       | Hs.534314       | Hs.164144                                    | Hs.164144       | Hs.164144       |
| Gene Title           | eukaryotic translation initiation factor 5A |                 |                 | eukaryotic translation initiation factor 5A2 |                 |                 |
| Gene Symbol          | EIF5A1                                      | EIF5A1          | EIF5A1          | EIF5A2                                       | EIF5A2          | EIF5A2          |
| Chromosomal Location | chr17p13-p12                                | chr17p13-p12    | chr17p13-p12    | chr3q26.2                                    | chr3q26.2       | chr3q26.2       |
| Ensembl ID           | ENSG00000132507                             | ENSG00000132507 | ENSG00000132507 | ENSG00000163577                              | ENSG00000163577 | ENSG00000163577 |
| Entrez Gene ID       | 1984                                        | 1984            | 1984            | 56648                                        | 56648           | 56648           |
