# Supplementary material
Source: publisher figshare collection journal article supplement (https://tandf.figshare.com/articles/dataset/_/19102319)
Supplement: Supplementary file 5 [file 2]

**Supplementary Table 2: Values and SE for four SynergyFinder Models**

|                  | ZIP    |        |        |         |           |
|------------------|--------|--------|--------|---------|-----------|
|                  | Exp1   | Exp2   | Exp3   | Avg     | SE        |
| <b>ACI-98</b>    | 12.395 | 7.316  | 8.578  | 9.4297  | 1.5267681 |
| <b>MSU-39</b>    | 14.233 | 14.319 | 18.341 | 15.631  | 1.3552274 |
| <b>MSU-64</b>    | 7.029  | 9.617  | 4.636  | 7.094   | 1.4382581 |
| <b>MSU-69</b>    | 13.774 | 12.764 | 11.432 | 12.657  | 0.6782038 |
| <b>MECPK-GFP</b> | 5.399  | 14.12  | 14.495 | 11.338  | 2.9714725 |
|                  |        |        |        |         |           |
|                  | Bliss  |        |        |         |           |
|                  | Exp1   | Exp2   | Exp3   | Avg     | SE        |
| <b>ACI-98</b>    | 9.484  | 6.028  | 7.751  | 7.7543  | 0.9976627 |
| <b>MSU-39</b>    | 14.242 | 14.311 | 18.341 | 15.631  | 1.3549797 |
| <b>MSU-64</b>    | 3.495  | 8.656  | 0.307  | 4.153   | 2.4324778 |
| <b>MSU-69</b>    | 13.775 | 12.764 | 11.432 | 12.657  | 0.6784784 |
| <b>MECPK-GFP</b> | 5.47   | 14.119 | 14.49  | 11.360  | 2.9467802 |
|                  |        |        |        |         |           |
|                  | Loewe  |        |        |         |           |
|                  | Exp1   | Exp2   | Exp3   | Avg     | SE        |
| <b>ACI-98</b>    | -1.381 | 0.315  | N/C    | -0.5330 | 0.6923891 |
| <b>MSU-39</b>    | 20.644 | 15.272 | 19.819 | 18.578  | 1.6702332 |
| <b>MSU-64</b>    | -4.005 | N/C    | N/C    | -4.005  | N/C       |
| <b>MSU-69</b>    | 22.393 | 13.473 | 13.031 | 16.299  | 3.0496704 |
| <b>MECPK-GFP</b> | 12.771 | 16.486 | 19.169 | 16.142  | 1.8549351 |
|                  |        |        |        |         |           |
|                  | HSA    |        |        |         |           |
|                  | Exp1   | Exp2   | Exp3   | Avg     | SE        |
| <b>ACI-98</b>    | -0.029 | 0.365  | 4.746  | 1.6940  | 1.5302328 |
| <b>MSU-39</b>    | 15.75  | 13.208 | 18.381 | 15.780  | 1.4933901 |
| <b>MSU-64</b>    | -4.662 | 3.657  | -8.2   | -3.068  | 3.5143488 |
| <b>MSU-69</b>    | 16.854 | 15.901 | 15.669 | 16.141  | 0.3625724 |
| <b>MECPK-GFP</b> | 13.264 | 19.545 | 19.787 | 17.532  | 2.1351432 |

>10 Synergistic, 1-10 Additive, <1 Antagonistic

N/C; not scored - software was unable to determine a value.

Avg, average; SE, standard error
